# Supplementary material for: Self-powered solar-blind ultraviolet-visible Cu2O/Ga2O3photodetectors
Source: Royal Society of Chemistry journal article supplement (doi:10.1039/d4tc00965g), 2024-01-01
Supplement: d4tc00965g1.pdf [file d4tc00965g1.pdf]

### Self-powered Solar-blind Ultraviolet-Visible $\text{Cu}_2\text{O}/\text{Ga}_2\text{O}_3$ Photodetectors

Xiaodan Wang, Jianping Xu\*, Shaobo Shi, Lina Kong, Xiangwei He, Jiahang He,  
Xiaosong Zhang, and Lan Li\*

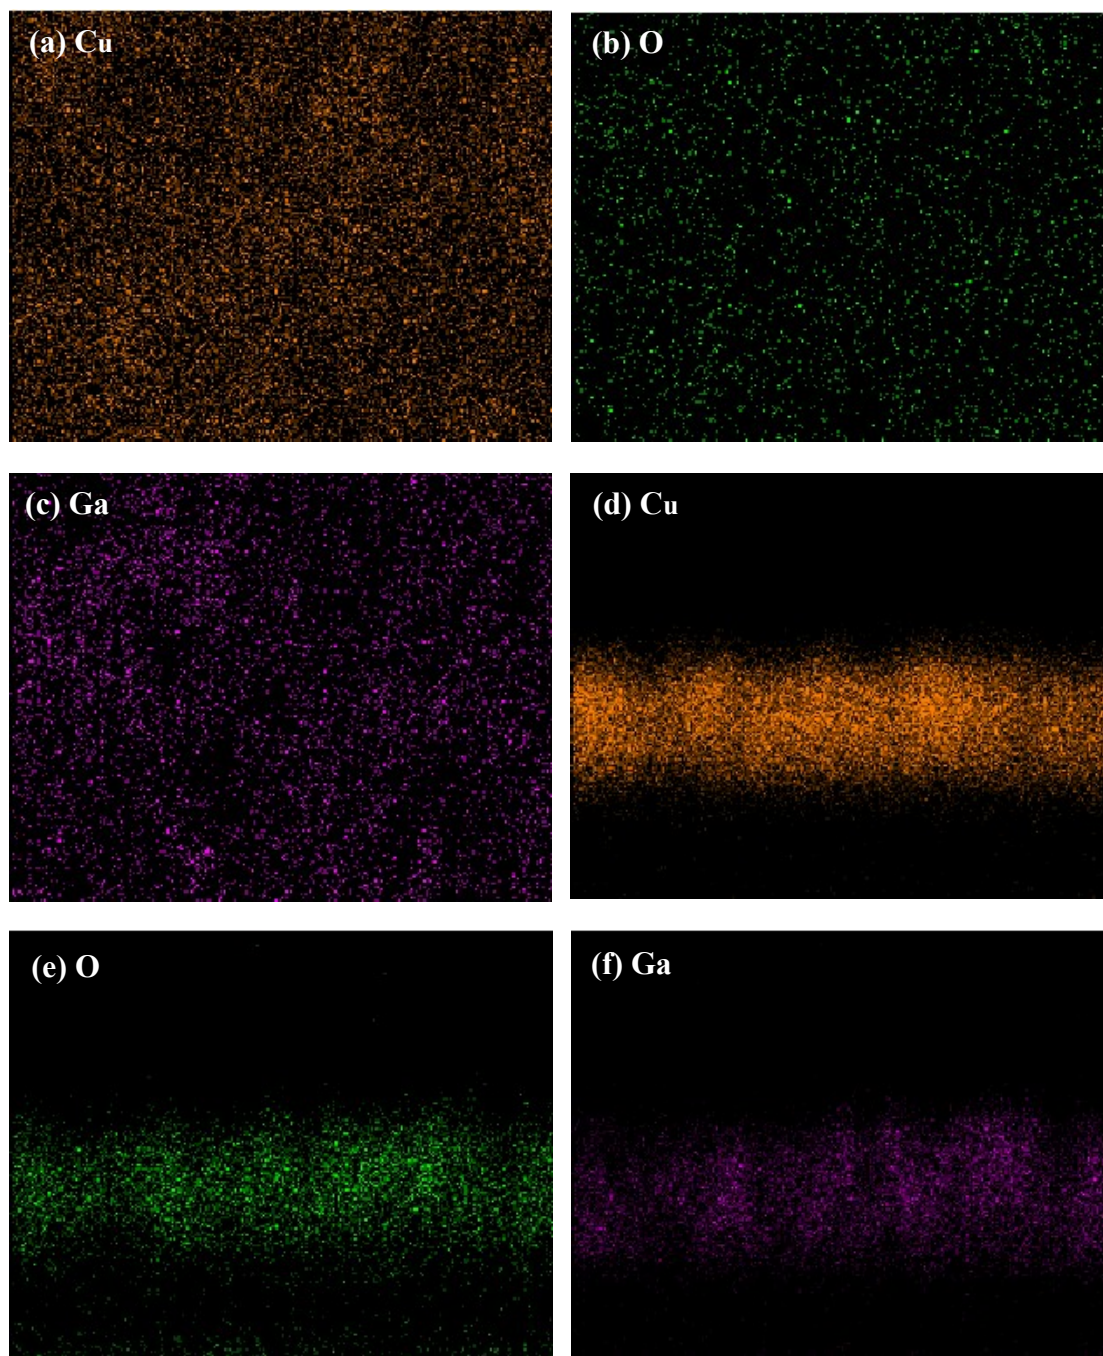

**Fig. S1** EDS plots (a)-(c) and (d)-(f) cross-sections of  $\text{Cu}_2\text{O}(9.5)/\text{Ga}_2\text{O}_3\text{NRs}$

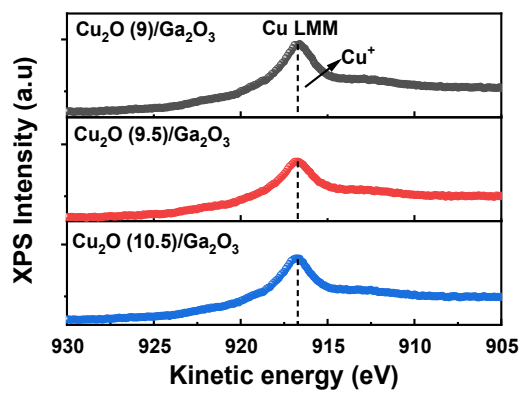

**Fig. S2** Auger spectrum of Cu

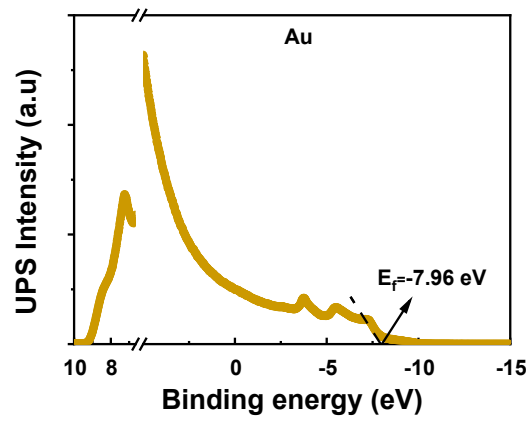

Fig. S3 Au calibrated UPS diagram

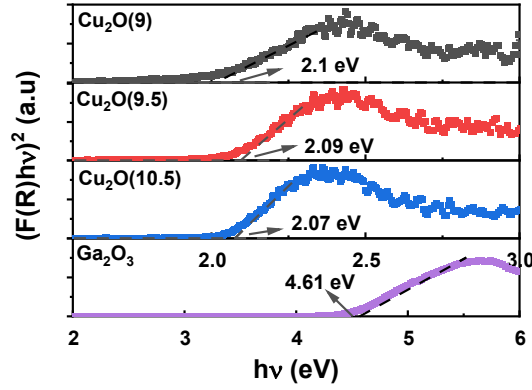

**Fig. S4** Optical band gap of  $\text{Ga}_2\text{O}_3$  and  $\text{Cu}_2\text{O}$  prepared at different pH values

The band gap ( $E_g$ ) of the thin film can be calculated by Tauc formula (1.1)-(1.3) through diffuse reflectance spectrum, where  $F(R)$  is a function related to diffuse reflectance  $R$ ,  $\alpha$  is the absorption coefficient, which is proportional to  $F(R)$ ,  $h\nu$  is photon energy,  $A$  and  $B$  are constants, and  $n$  depends on the electron transition mode in the material, so take  $1/2$  for the direct band gap semiconductor and  $2$  for the indirect band gap semiconductor.

$$F(R) = \frac{(1-R)^2}{2R} \quad (1.1)$$

$$(\alpha h\nu)^{1/n} = A (h\nu - E_g) \quad (1.2)$$

$$(F(R)h\nu)^{1/n} = B (h\nu - E_g) \quad (1.3)$$

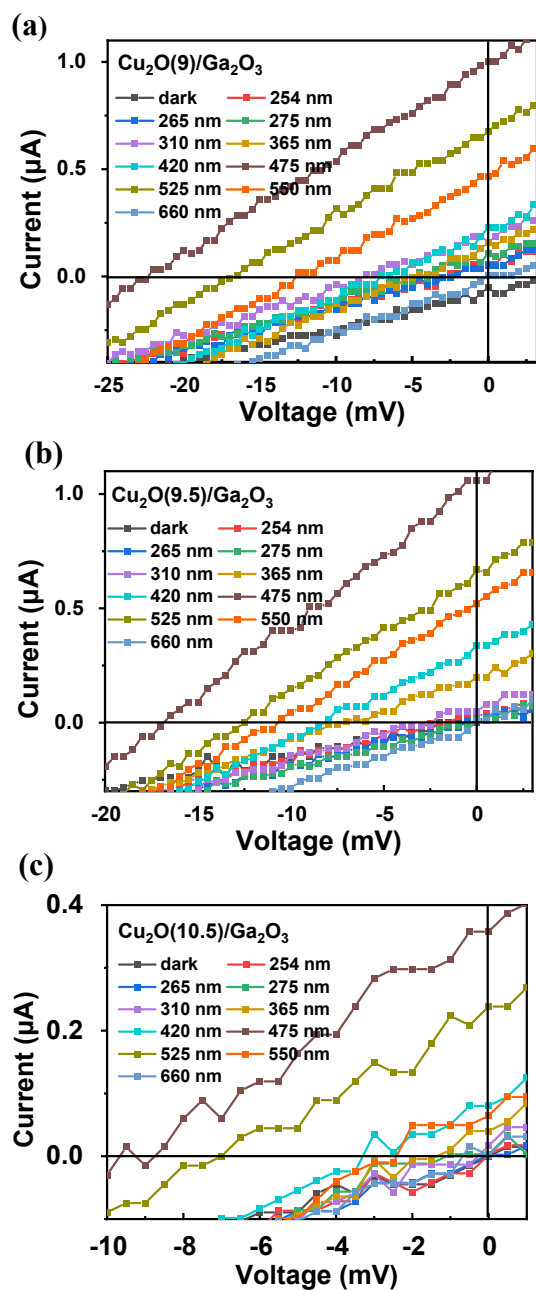

**Fig. S5** Dark-state and light-state I-V curves of  $\text{Cu}_2\text{O}/\text{Ga}_2\text{O}_3$  heterojunction devices prepared at different pH values and under optical power density of  $4 \text{ mW}/\text{cm}^2$  illumination (b) pH = 9, (c) pH = 9.5 and (d) pH = 10.5

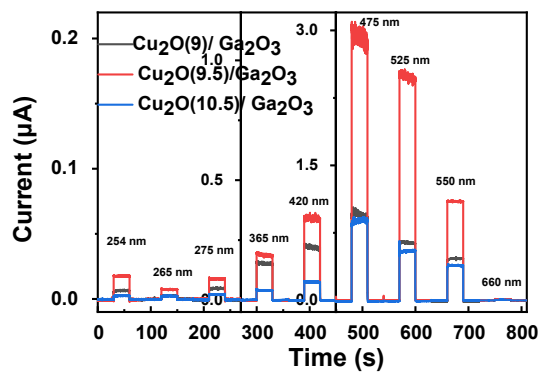

**Fig. S6** I-t curves of Cu<sub>2</sub>O/Ga<sub>2</sub>O<sub>3</sub> heterojunction devices under 0 V bias and different wavelengths of light illumination

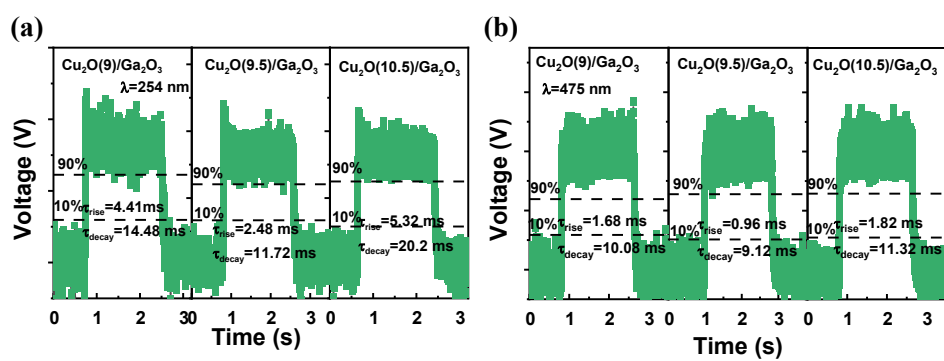

**Fig. S7** Response velocity of  $\text{Cu}_2\text{O}/\text{Ga}_2\text{O}_3$  prepared by different pH deposition solutions under (a) 254, (b) 475 nm illumination

Table S1. Comparison of the photoresponse time of the Cu<sub>2</sub>O/Ga<sub>2</sub>O<sub>3</sub> PDs with [the other](#) previously reported Ga<sub>2</sub>O<sub>3</sub> based PDs without external power supply

| Heterojunction                                     | Wavelength | $\tau_{\text{rise}}$ | $\tau_{\text{decay}}$ | Ref       |
|----------------------------------------------------|------------|----------------------|-----------------------|-----------|
| $\beta$ -Ga <sub>2</sub> O <sub>3</sub> /GaN       | 254 nm     | 0.14 s               | 0.07 s                | [41]      |
| NiO/Ga <sub>2</sub> O <sub>3</sub>                 | 254 nm     | 0.34 s               | 3.65 s                | [42]      |
| Ga <sub>2</sub> O <sub>3</sub> /Spiro-MeOTAD       | 248 nm     | 2.98 $\mu$ s         | 28.49 $\mu$ s         | [43]      |
| PEDOT:PSS/Ga <sub>2</sub> O <sub>3</sub>           | 248 nm     | 3.31 $\mu$ s         | 71.2 $\mu$ s          | [44]      |
| SnSrO <sub>3</sub> /Ga <sub>2</sub> O <sub>3</sub> | 254 nm     | 0.15 s               | 0.06 s                | [45]      |
| Au/Ga <sub>2</sub> O <sub>3</sub> /Si              | 254 nm     | 32.2 ms              | 78 ms                 | [46]      |
| Ga:ZnO/Ga <sub>2</sub> O <sub>3</sub>              | 254 nm     | 179 ms               | 272 ms                | [47]      |
| Pt NPs/NiO/Ga <sub>2</sub> O <sub>3</sub>          | 254 nm     | 4.6 ms               | 7.6 ms                | [48]      |
| NSTO/Ga <sub>2</sub> O <sub>3</sub>                | 254 nm     | 0.21 s               | 0.07 s                | [49]      |
| Cu <sub>2</sub> O/Ga <sub>2</sub> O <sub>3</sub>   | 254 nm     | 2.48 ms              | 11.72 ms              | This Work |
